# Supplementary material for: Human skeletal myotubes display a cell-autonomous circadian clock implicated in basal myokine secretion
Source: PubMed Central journal article supplement — Mol Metab. 2015 Aug 6;4(11):834–45. doi: 10.1016/j.molmet.2015.07.009 (PMC4632112; doi:10.1016/j.molmet.2015.07.009), 2015-08-06
Supplement: mmc1.pdf [file mmc1.pdf]

**Supplementary data to :**

**Human skeletal myotubes display a cell-autonomous circadian clock  
implicated in basal myokine secretion**

**Laurent Perrin<sup>1</sup>, Ursula Loizides-Mangold<sup>1,6</sup>, Svetlana Skarupelova<sup>1,6</sup>, Pamela Pulimeno<sup>1</sup>, Stephanie Chanon<sup>2</sup>, Maud Robert<sup>3</sup>, Karim Bouzakri<sup>4</sup>, Christine Modoux<sup>5</sup>, Pascale Roux-Lombard<sup>5</sup>, Hubert Vidal<sup>2</sup>, Etienne Lefai<sup>2</sup>, Charna Dibner<sup>1,\*</sup>**

<sup>1</sup>Division of Endocrinology, Diabetes and Nutrition, Department of Clinical Medicine, Faculty of Medicine, University of Geneva, Geneva, Switzerland

<sup>2</sup>CarMeN Laboratory, INSERM U1060, INRA 1397, University Lyon 1, Oullins, France

<sup>3</sup>Department of Digestive and Bariatric Surgery, Edouard Herriot Hospital, Lyon, France

<sup>4</sup>Department of Genetic Medicine and Development, Faculty of Medicine, University of Geneva, Geneva, Switzerland

<sup>5</sup>Division of Immunology and Allergy, Department of Medical Specialties, University Hospital and Faculty of Medicine, University of Geneva, Geneva, Switzerland

<sup>6</sup>U. Loizides-Mangold and S. Skarupelova contributed equally to this study

**\*Corresponding author.** Charna Dibner; Division of Endocrinology, Diabetes, Hypertension and Nutrition, Department of Clinical Medicine, Faculty of Medicine, University of Geneva, Aile Jura 4-774, Rue Gabrielle-Perret-Gentil 4, CH-1211 Geneva, Switzerland

email: Charna.Dibner@hcuge.ch

Phone: +41 22 372 93 18; Fax: +41 22 372 93 26

## Table of Contents

|                                                                                                                                                                 |          |
|-----------------------------------------------------------------------------------------------------------------------------------------------------------------|----------|
| <b>Supplementary Tables .....</b>                                                                                                                               | <b>3</b> |
| Supplementary Table 1 .....                                                                                                                                     | 3        |
| Supplementary Table 2 .....                                                                                                                                     | 4        |
| <b>Supplementary Figures.....</b>                                                                                                                               | <b>5</b> |
| Supplementary Figure 1: Differentiation of <i>in vitro</i> cultured human skeletal myoblasts to myotubes.....                                                   | 5        |
| Supplementary Figure 2: <i>In vitro</i> synchronization by forskolin or dexamethasone induces pronounced circadian oscillations in human skeletal myotubes..... | 6        |
| Supplementary Figure 3: Oscillation profiles of core clock transcripts in dexamethasone-synchronized human myotubes. ....                                       | 7        |
| Supplementary Figure 4: Impact of CLOCK knockdown on the oscillatory profile of dexamethasone-synchronized human myotubes. ....                                 | 8        |
| Supplementary Figure 5: Basal IL-6 protein secretion profile after dexamethasone or forskolin synchronization. ....                                             | 9        |

## Supplementary Tables

**Supplementary Table 1**

| Sequences of human qPCR primers   |                 |                                   |
|-----------------------------------|-----------------|-----------------------------------|
| Gene name                         | Primer sequence |                                   |
| <i>BMAL1</i>                      | Forward         | 5'-CCCTTGGACCAAGGAAGTAGAA-3'      |
|                                   | Reverse         | 5'-CTTCCAGGACGTTGGCTAAAAC-3'      |
| <i>CRY1</i>                       | Forward         | 5'-GAGAACAGATCCCAATGGAGACTATAT-3' |
|                                   | Reverse         | 5'-CCTCTTAGGACAGGCAAATAACG-3'     |
| <i>REV-ERB<math>\alpha</math></i> | Forward         | 5'-GATCGTGAGTCGCGGGGTCC-3'        |
|                                   | Reverse         | 5'-TGTAGGTGATGACGCCACCTGTGT-3'    |
| <i>PER2</i>                       | Forward         | 5'-CGCAGGGTGCCTCGTTTGA-3'         |
|                                   | Reverse         | 5'-GCTGGGCTCTGGAACGAAGCTTTCG-3'   |
| <i>PER3</i>                       | Forward         | 5'-CCTGGACCCTGAACATGCA-3'         |
|                                   | Reverse         | 5'-TGTGAGCCCCACGTGTTTAA-3'        |
| <i>DBP</i>                        | Forward         | 5'-TAGAAGGAGCGCCTTGAGTC-3'        |
|                                   | Reverse         | 5'-GCAACCCTCCAGTATCCAGA-3'        |
| <i>CLOCK</i>                      | Forward         | 5'-CAAGCCACCGCAACAATT-3'          |
|                                   | Reverse         | 5'-GGATTCCCATGGAGCAACCTA-3'       |
| <i>IL6</i>                        | Forward         | 5'-GGTACATCCTCGACGGCATCT-3'       |
|                                   | Reverse         | 5'-GTGCCTCTTTGCTGCTTTCAC-3'       |
| <i>9S</i>                         | Forward         | 5'-CTCCGGAACAAACGTGAGGT-3'        |
|                                   | Reverse         | 5'-TCCAGCTTCATCTTGCCCTC-3'        |
| <i>GAPDH</i>                      | Forward         | 5'-GAAGGTGAAGGTCGGAGTC-3'         |
|                                   | Reverse         | 5'-GAAGATGGTGATGGGATTTTC-3'       |
| <i>HPRT</i>                       | Forward         | 5'-GATTTTATCAGACTGAGGAGC-3'       |
|                                   | Reverse         | 5'-TCCAGTTAAAGTTGAGAGATC-3'       |

## Supplementary Table 2

| Amplitude of <i>siControl</i> and <i>siClock</i> -transfected samples determined by JTK_CYCLE |                                         |                                   |             |            |
|-----------------------------------------------------------------------------------------------|-----------------------------------------|-----------------------------------|-------------|------------|
|                                                                                               | <i>BMAL1</i>                            | <i>REV-ERB<math>\alpha</math></i> | <i>PER3</i> | <i>DBP</i> |
|                                                                                               | Normalized mean amplitude (fold change) |                                   |             |            |
| <i>siControl</i>                                                                              | 0.62                                    | 0.77                              | 2.6         | 5.91       |
| <i>siClock</i>                                                                                | 0.8                                     | 0.51                              | 1.46        | 2.99       |

## Supplementary Figures

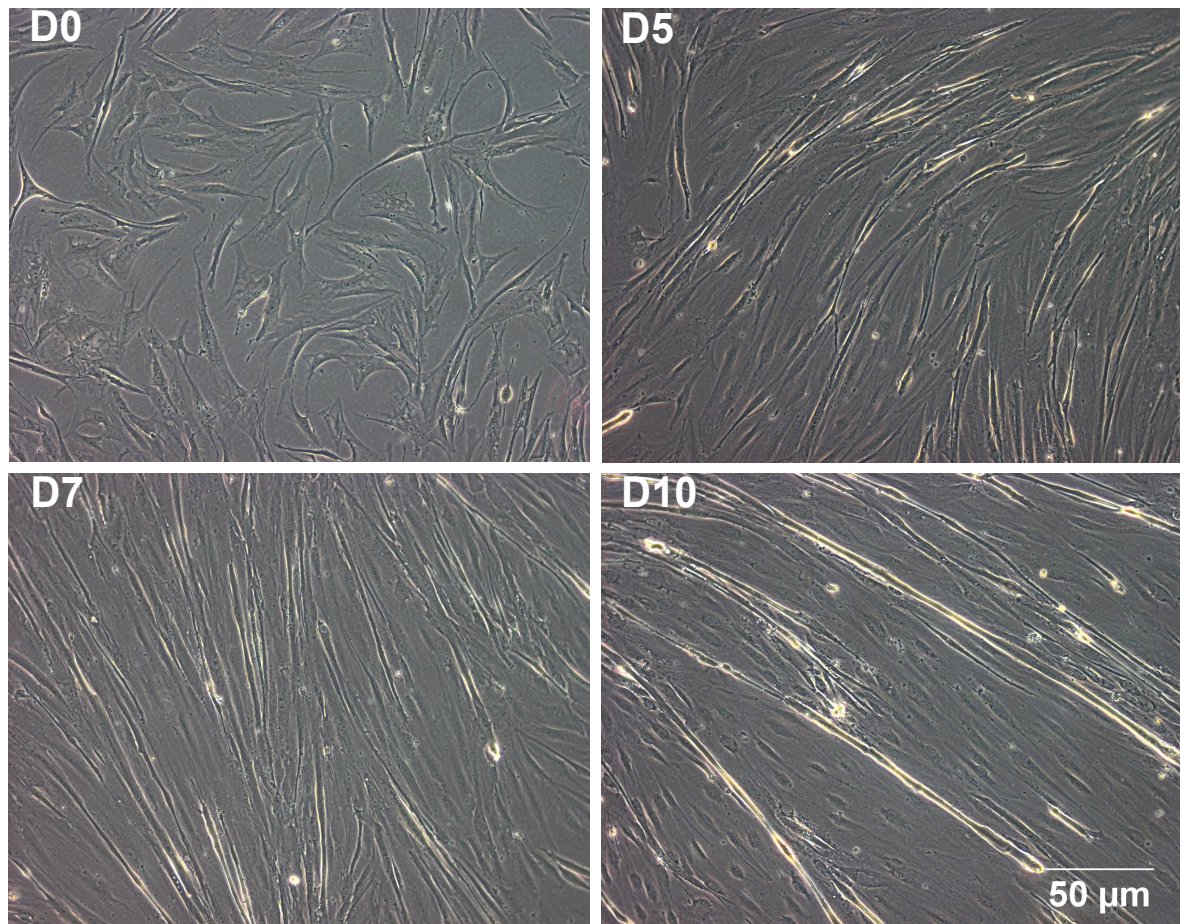

### Supplementary Figure 1: Differentiation of *in vitro* cultured human skeletal myoblasts to myotubes.

Representative photos were taken with a Zeiss Axiovert 200 microscope at day 0 (D0), D5, D7, and D10 following start of the differentiation process (switch from 20% to 2% FBS-containing medium, see Material and Methods for details). D0: start of the differentiation process; D5: cells are oriented in the same direction and fusion has already begun; D7: differentiation is complete; D10: myotubes keep the differentiated status for several days.

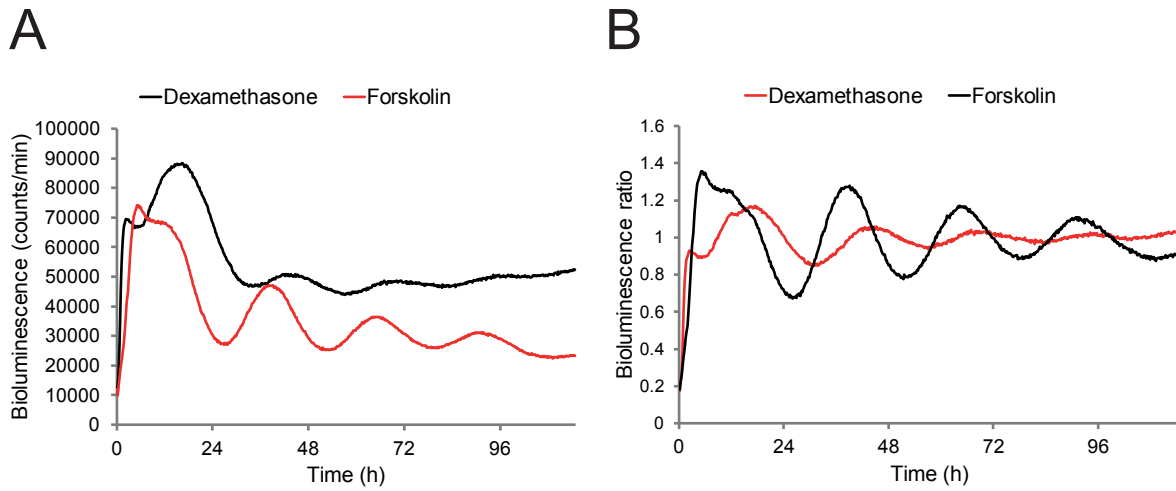

**Supplementary Figure 2: *In vitro* synchronization by forskolin or dexamethasone induces pronounced circadian oscillations in human skeletal myotubes.**

*Bmal1-luc* bioluminescence profiles were recorded from human myotubes, synchronized with a 30 min pulse of 100 nM dexamethasone (black line) or with a 1 h pulse of 10  $\mu$ M forskolin (red line). Raw (A) and detrended (B) oscillation profiles are representative of 2 independent experiments (one donor each) performed in duplicates.

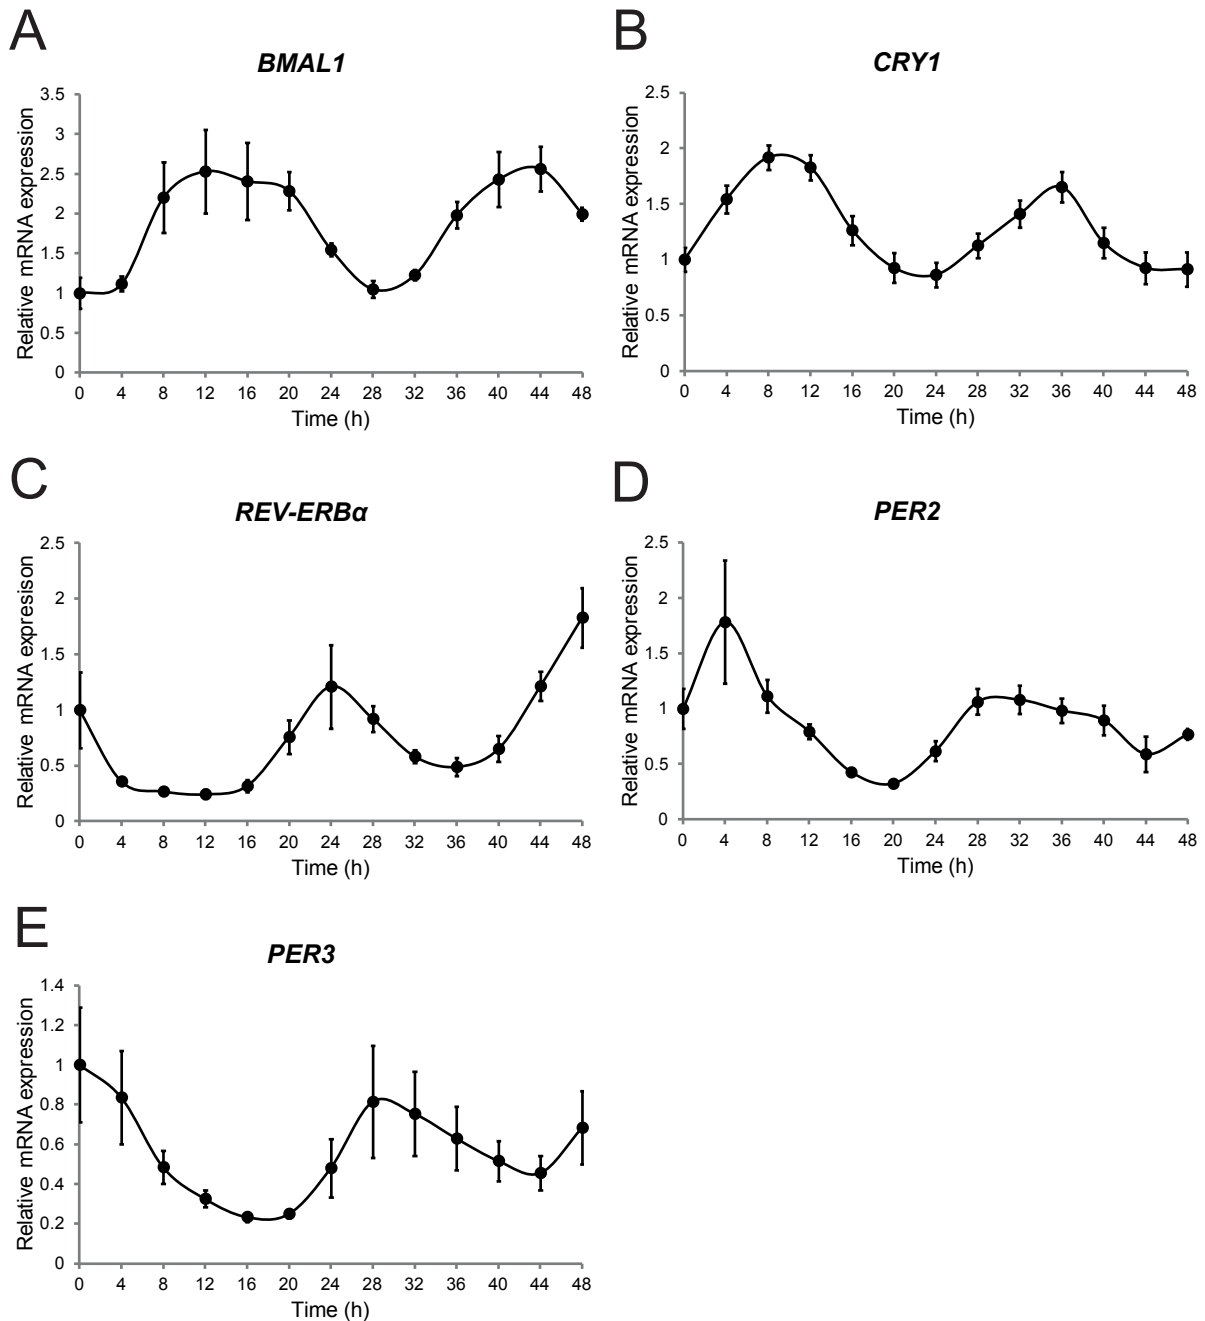

**Supplementary Figure 3: Oscillation profiles of core clock transcripts in dexamethasone-synchronized human myotubes.**

Endogenous expression of core clock transcripts was assessed in dexamethasone-synchronized myotubes, collected every 4 h during 48 h following synchronization. RT-qPCRs were performed in RNA samples extracted from human myotubes to assess (A) *BMAL1*, (B) *CRY1*, (C) *REV-ERB $\alpha$* , (D) *PER2*, (E) *PER3*, and normalized to the mean of *9S-GAPDH*. Profiles are representative of  $n = 4$  experiments (mean  $\pm$  SEM), each performed with myotubes from one donor in duplicates for every condition.

**A**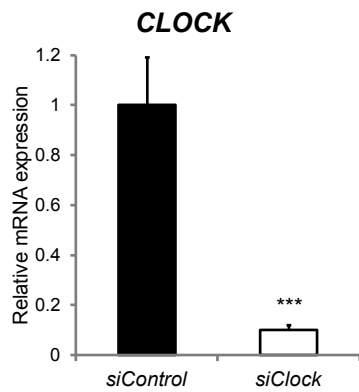**B**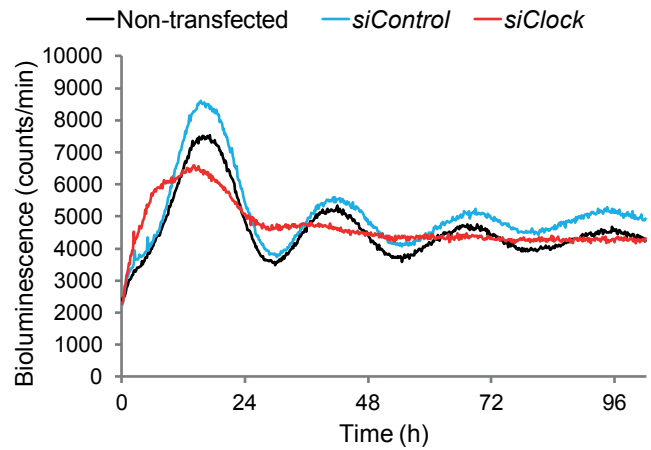

**Supplementary Figure 4: Impact of CLOCK knockdown on the oscillatory profile of dexamethasone-synchronized human myotubes.**

Myoblasts were transfected with *siClock* or *siControl* and differentiated into myotubes. (A) *CLOCK* transcript expression, as assessed by RT-qPCR and normalized to the mean of *9S-GAPDH*, was reduced  $90 \pm 2.2\%$  (mean  $\pm$  SEM,  $n = 5$ ) in *siClock* transfected samples compared to *siControl* counterparts (\*\*\*)  $p < 0.001$ ). (B) Representative *Bmal1-luc* oscillation profiles in *siControl*-transfected (blue line), *siClock*-transfected (red line), or non-transfected (black line) human myotubes, synchronized with dexamethasone. *Bmal1-luc* oscillation profiles were recorded in duplicates in  $n = 8$  experiments (one donor per experiment).



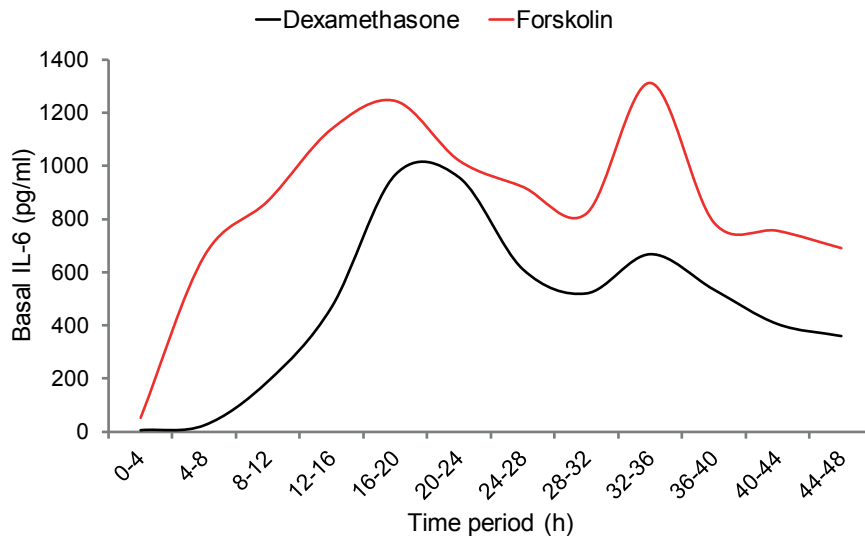

**Supplementary Figure 5: Basal IL-6 protein secretion profile after dexamethasone or forskolin synchronization.**

Human myotubes, transduced with the *Bmal1-luc* lentivector, were synchronized with dexamethasone (black line) or with forskolin (red line), and perfused for 48 h with culture medium;  $n = 2$  experiments with one donor each. The perfusion outflow medium was collected in 4 h intervals and basal IL-6 levels in the medium were assessed by ELISA (0-4 corresponds to the accumulation of IL-6 between 0 and 4 h), normalized to the total DNA content.
